# Supplementary material for: Reticular chemistry guided single-linker constructed pillar-layered metal–organic frameworks via an in situ “one-pot” strategy
Source: Royal Society of Chemistry journal article supplement (doi:10.1039/d4dt01729c), 2024-01-01
Supplement: d4dt01729c1.pdf [file d4dt01729c1.pdf]

*Supporting Information*

**Reticular Chemistry Guided Single-Linker Constructed Pillar-Layered  
Metal-Organic Frameworks Via *In Situ* “One-Pot” Strategy**

Zhen-Sha Ma,<sup>†,‡</sup> Hui Yang,<sup>‡</sup> Kai Xing,<sup>\*,§</sup> Kang Zhou,<sup>‡</sup> Gonghao Lu,<sup>\*,†</sup> and Xiao-Yuan Liu,<sup>\*,‡</sup>

<sup>†</sup> School of Chemical Engineering, University of Science and Technology Liaoning, 185 Qianshan Zhong Road, Anshan 114051, P. R. China

<sup>‡</sup> Hoffmann Institute of Advanced Materials, Shenzhen Polytechnic, 7098 Liuxian Blvd, Nanshan District, Shenzhen, 518055, P. R. China

<sup>§</sup> Department of Chemistry, College of Basic Medicine, Third Military Medical University (Army Medical University), Chongqing, 400038, P. R. China

## **Chemicals**

Isonicotinaldehyde and 4-(pyridin-4-yl)benzaldehyde were purchased from Shanghai Aladdin Biochemical Technology Co., Ltd. 2',3'-diamino-[1,1':4',1''-terphenyl]-4,4''-dicarboxylic acid (H<sub>2</sub>DATC) was synthesized according to our previous work.<sup>1</sup> All the other chemicals were obtained from the chemical supplies and used without further purification.

## **Characterization**

Powder X-ray diffraction (PXRD) patterns were recorded using Bruker D8 Advance X-ray diffractometer. Single crystal X-ray diffraction data were collected on a Bruker D8 Venture diffractometer. Nuclear magnetic resonance (NMR) data was collected using 400 MHz JEOL JNM-ECZ400S. The photoluminescent spectra were measured on FLS1000 spectrofluorometer (Edinburgh Instruments). The UV-vis spectra were recorded on Shimadzu UV-3600 spectrophotometer. The TGA data was collected using TGA 550 (TA Instruments) analyzer and the samples were heated from room temperature to 600°C at a ramp rate of 10°C / min.

**Synthesis of 4,4'-(2-(pyridin-4-yl)-1H-benzo[d]imidazole-4,7-diyl)dibenzoic acid (H<sub>2</sub>PBIA)**

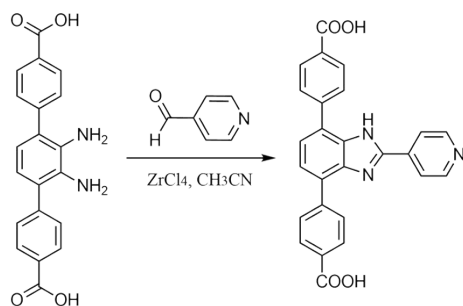

2,3'-diamino-[1,1':4',1''-terphenyl]-4,4''-dicarboxylic acid (2.0 mmol, 0.70 g), isonicotinaldehyde (2.1 mmol, 0.22 g) and ZrCl<sub>4</sub> (0.20 mmol, 46.6 mg) were added into a flask containing 30 mL CH<sub>3</sub>CN. The mixture was stirred at room temperature for 24 h under N<sub>2</sub> atmosphere. Then 4,4'-(2-(pyridin-4-yl)-1H-benzo[d]imidazole-4,7-diyl)dibenzoic acids (H<sub>2</sub>PBIA) was obtained after filtration (0.79 g, yield: 90.8%). <sup>1</sup>H NMR (400 MHz, DMSO-*d*<sub>6</sub>) δ ppm 8.84 (2H), 8.47 (2H), 7.09 (8H), 7.62 (2H).

### **Synthesis of HIAM-3016-op**

Zn(NO<sub>3</sub>)<sub>2</sub>·6H<sub>2</sub>O (0.17 mmol, 49.4 mg), H<sub>2</sub>DATC (0.075 mmol, 26.1 mg) and isonicotinaldehyde (0.077 mmol, 8.2 mg) were added into a 5 mL vial containing 3 mL DMF. After sonicating for 5 minutes, the capped vial was put in a pre-heated oven to react at 100 °C for 3 days. The obtained single crystals were washed with DMF (1 mL) several times to remove unreacted organic linkers.

### **Synthesis of HIAM-3016**

Zn(NO<sub>3</sub>)<sub>2</sub>·6H<sub>2</sub>O (0.2 mmol, 59.4 mg) and H<sub>2</sub>PBIA (0.075 mmol, 33.0 mg) were added into a 5 mL vial containing 3 mL DMF. After sonicating for 5 minutes, the capped vial was put in a pre-heated oven to react at 100 °C for 3 days. The obtained single crystals were washed with DMF (1 mL) several times to remove unreacted ligand.

### **Synthesis of HIAM-3017-op**

Zn(NO<sub>3</sub>)<sub>2</sub>·6H<sub>2</sub>O (0.17 mmol, 49.4 mg) and H<sub>2</sub>DATC (0.075 mmol, 26.1 mg) and 4-(pyridin-4-yl)benzaldehyde (0.077 mmol, 14 mg) were added into a 5 mL vial containing 3 mL DMF. After sonicating for 5 minutes, the capped vial was put in a pre-heated oven to react at 100 °C for 3 days. The obtained single crystals were washed with DMF (1 mL) several times to remove unreacted organic linkers.

### **Digestion Procedure of Zn-MOFs for $^1\text{H}$ NMR measurement**

10 mg as-synthesized HIAM-3016-op were washed several times using DMF, then the collected solid samples in 5 mL vials were put into one 150 °C oven overnight. After cooling down to room temperature, 500 uL 10 M NaOH/D<sub>2</sub>O solution was added into the vial by sonication for 5 mins and standing for 5 h. The D<sub>2</sub>O layer was used for  $^1\text{H}$  NMR measurement.

10 mg as-synthesized HIAM-3017-op were washed several times using DMF, then the collected solid samples in 5 mL vials were put into one 150 °C oven overnight. After cooling down to room temperature, 100 uL 10 M NaOH solution was added into the vial, which were put into one 100 °C oven for 4 hours. Then 100 uL concentrated HCl was added, which were put into one 100 °C oven for 4 hours. Then 800 uL DMSO-d<sub>6</sub> was added to dissolve the digested sample. After filtering, the solution of DMSO-d<sub>6</sub> containing linkers was used for the  $^1\text{H}$  NMR measurement.

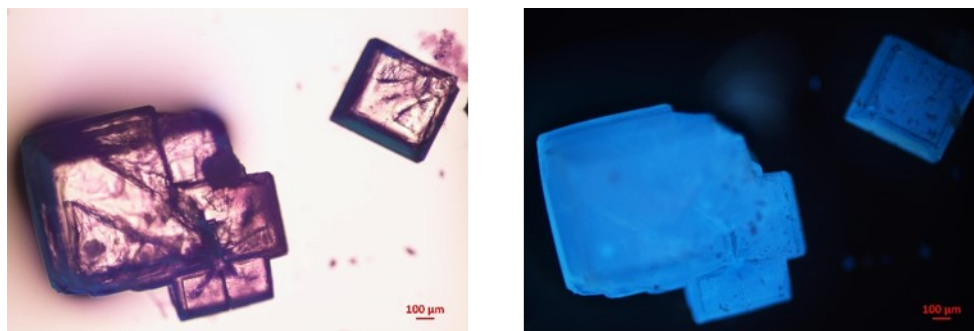

Figure S1. The single-crystal images of HIAM-3016-op under daylight (left) and 365 nm excitation (right).

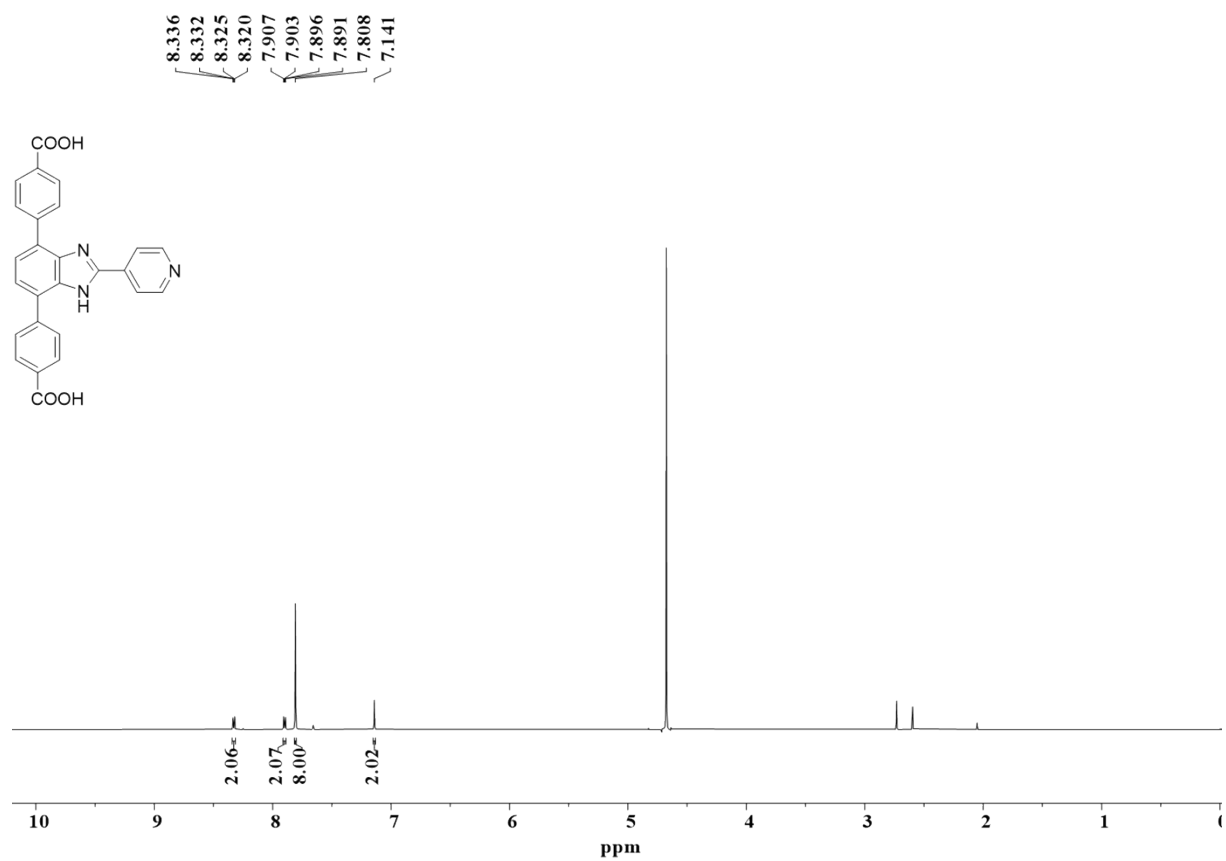

Figure S2. The <sup>1</sup>H NMR spectrum of digested HIAM-3016-op in D<sub>2</sub>O and the molecular structure of H<sub>2</sub>PBIA.

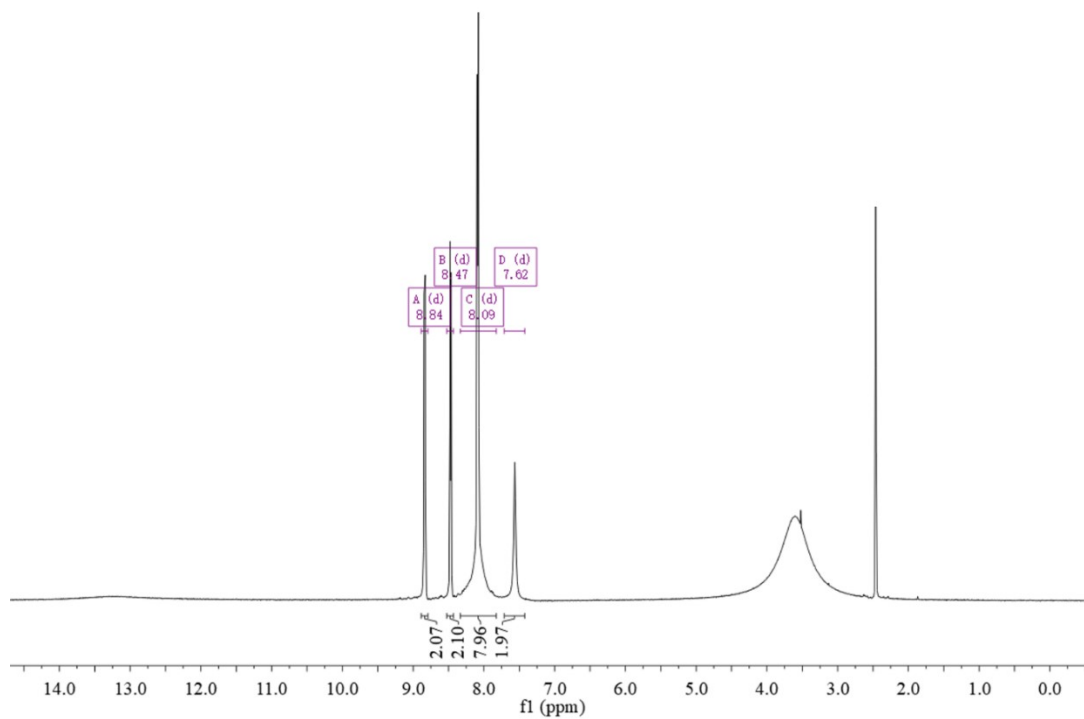

Figure S3.  $^1\text{H}$  NMR spectrum of directly synthesized  $\text{H}_2\text{PBIA}$  in  $\text{DMSO-}d_6$ .

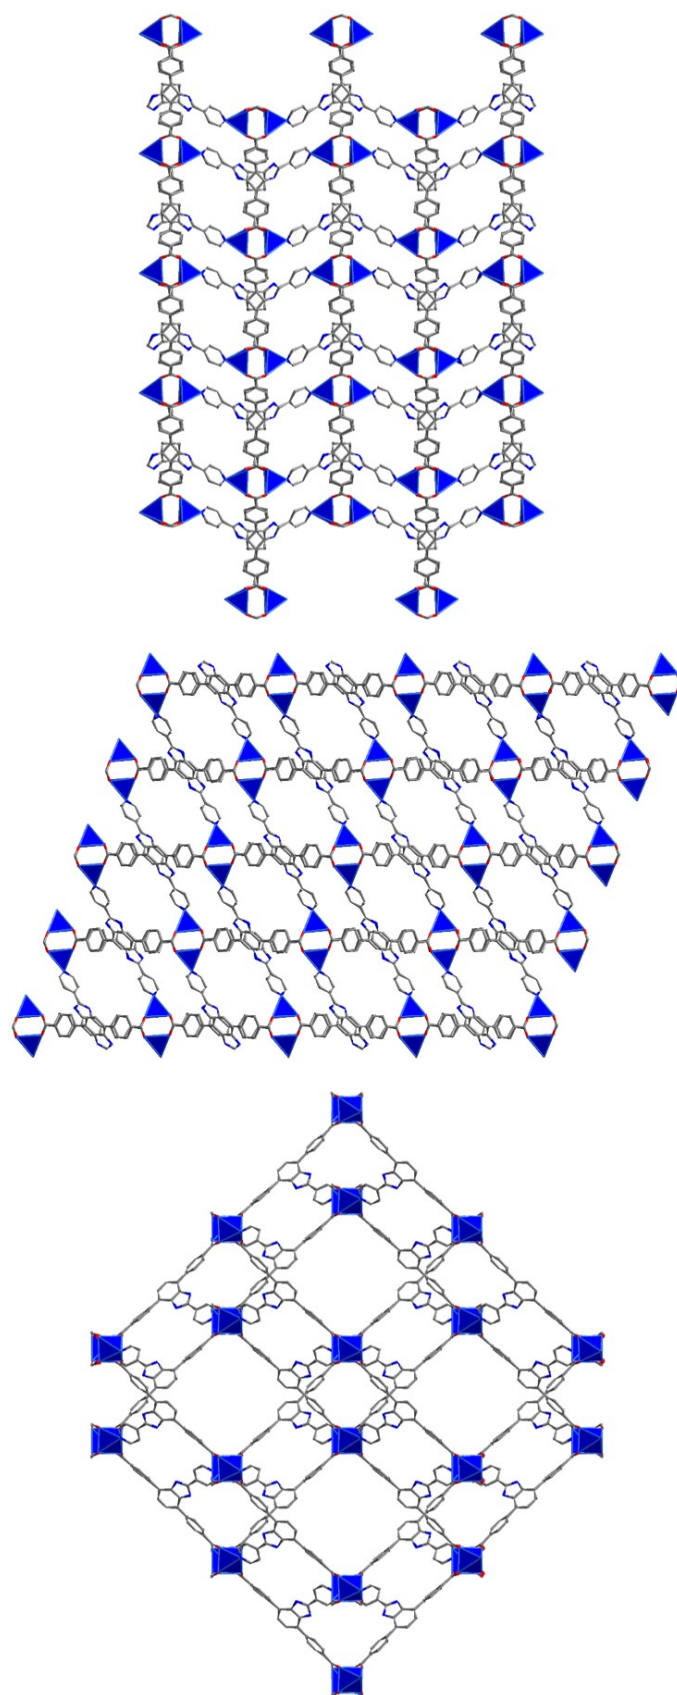

Figure S4. The single crystal structure of HIAM-3016-op viewed along a (above), b (middle) and c (below) axis.



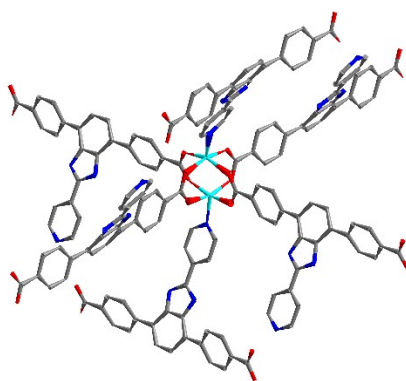

Figure S5. The coordination condition of paddle-wheel  $Zn_2(COO)_4$  in HIAM-3016-op.

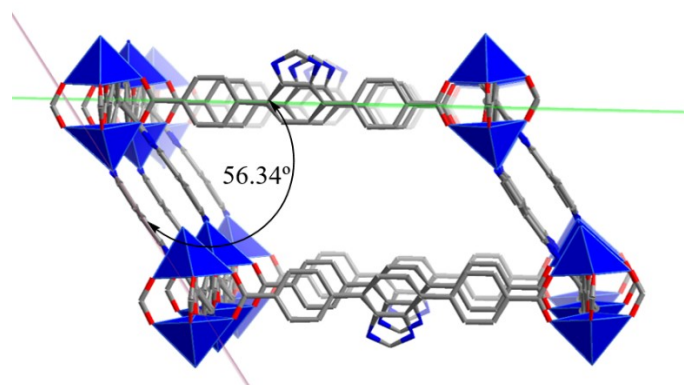

Figure S6. The angle between the 2D layer and the pillar in HIAM-3016-op.

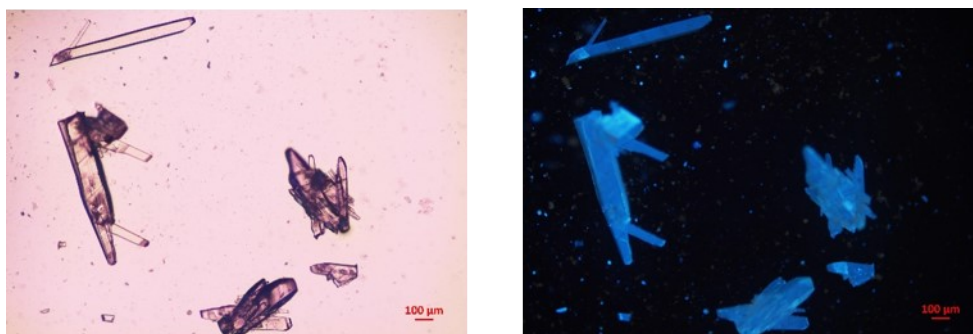

Figure S7. The single-crystal images of HIAM-3017-op under daylight (left) and 365 nm excitation (right).

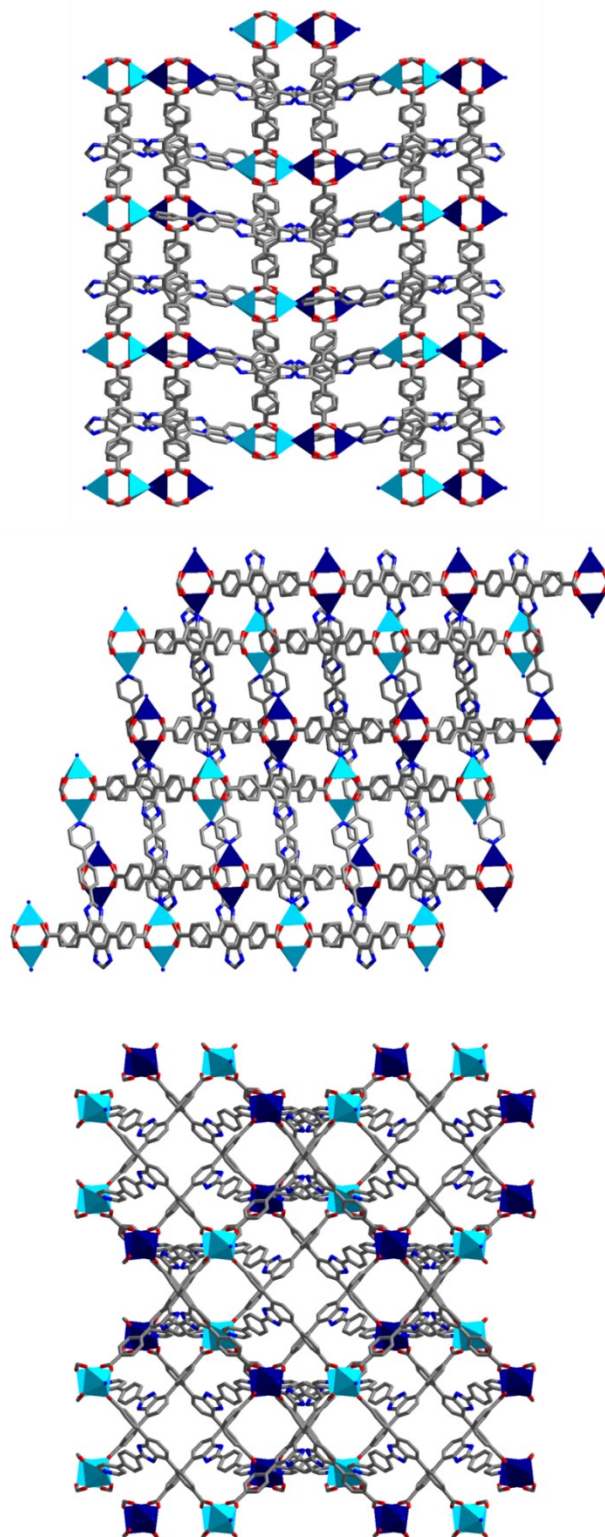

Figure S8. The single crystal structure of HIAM-3017-op viewed along a (above), b (middle) and c (below) axis.

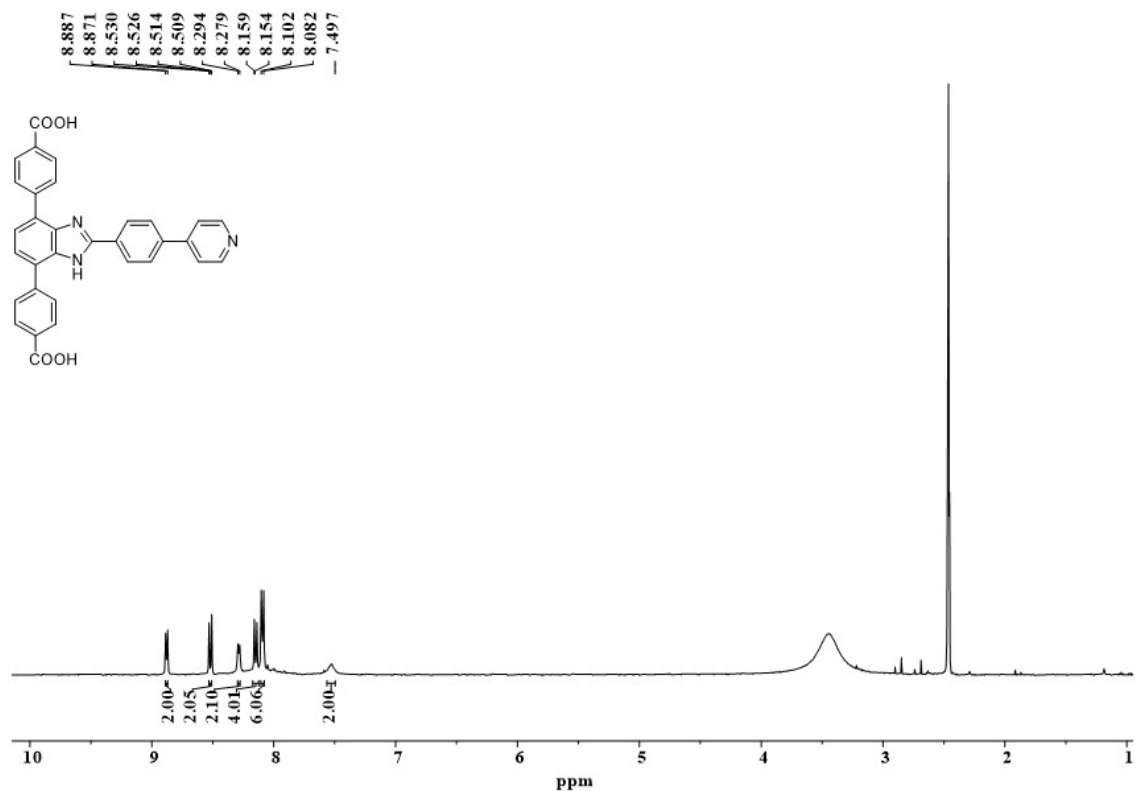

Figure S9. The <sup>1</sup>H NMR spectrum of digested HIAM-3017-op in D<sub>2</sub>O and the molecular structure of H<sub>2</sub>PPBIA.

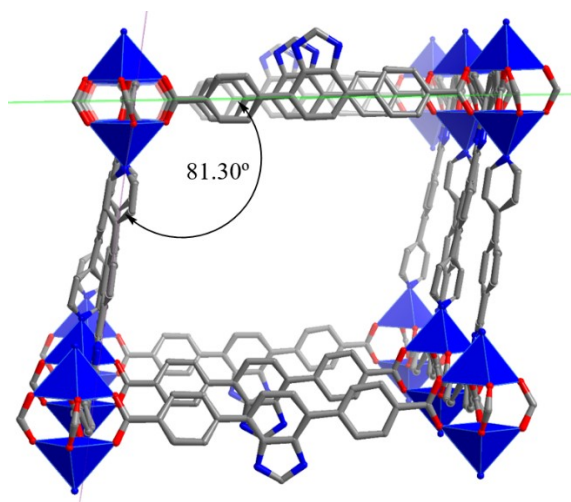

Figure S10. The angle between the 2D layer and the pillar in HIAM-3017-op.

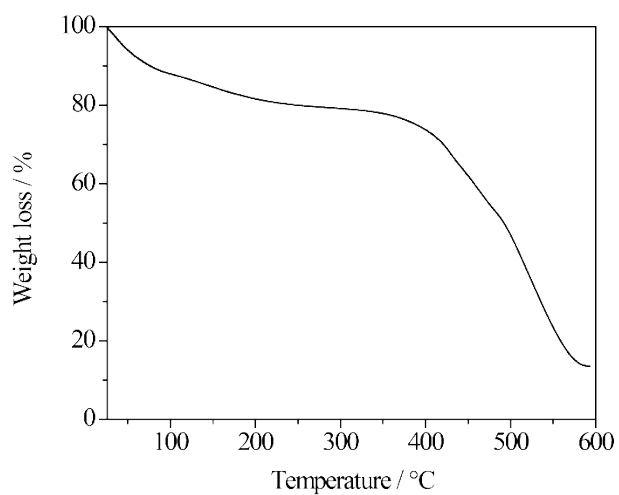

Figure S11. TGA curve of HIAM-3016-op.

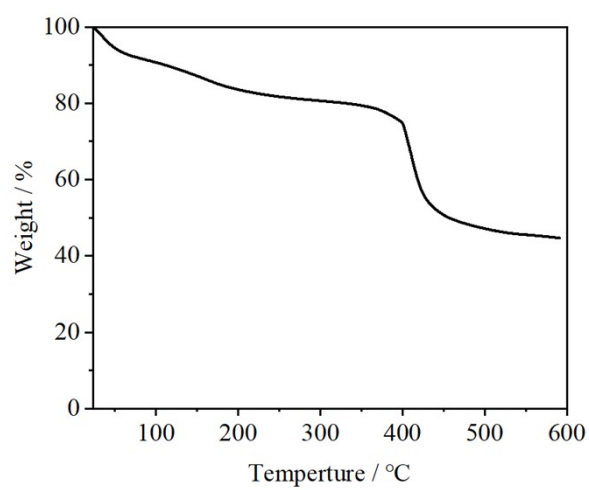

Figure S12. TGA curve of HIAM-3017-op.

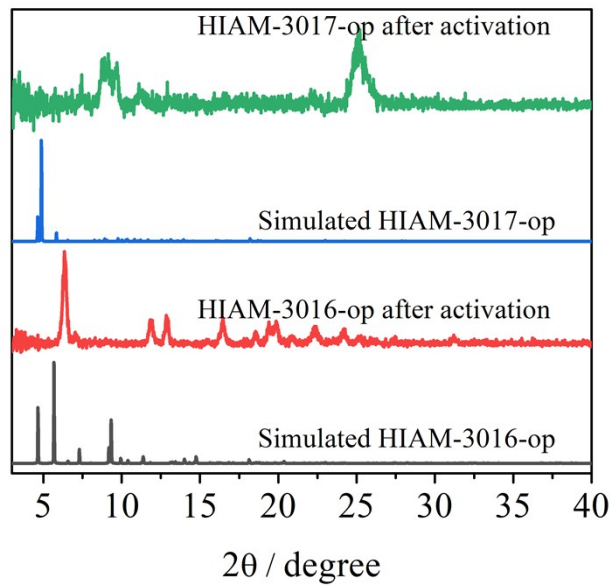

Figure S13. The PXR D patterns of HIAM-3016-op and HIAM-3017-op after activated using supercritical CO<sub>2</sub>.

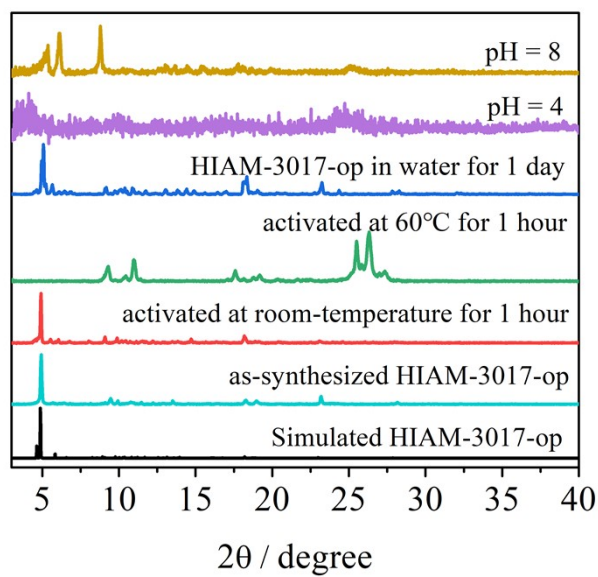

Figure S14. The PXR D patterns of HIAM-3017-op after treated under various conditions.

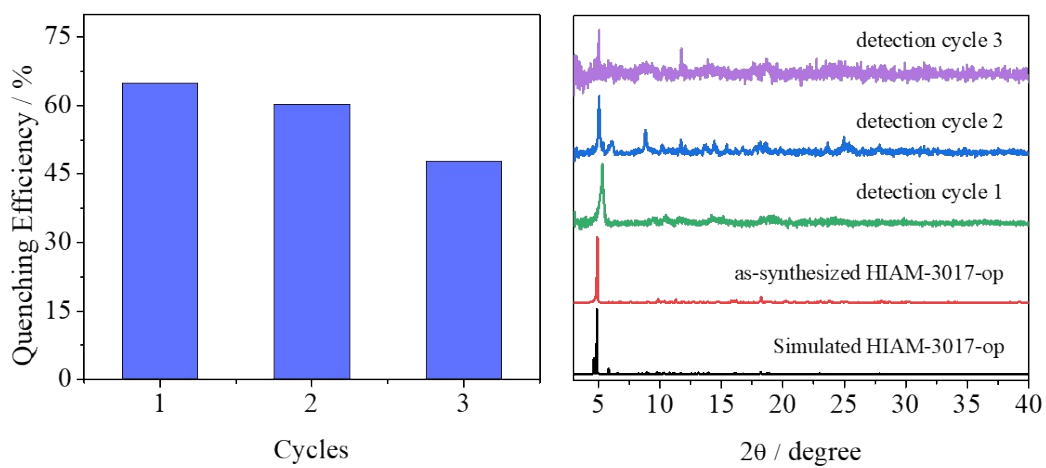

Figure S15. The quenching efficiencies of HIAM-3017-op for three cycles (left) and corresponding PXRD patterns of HIAM-3017-op after each cycle (right).

Table S1. Crystal data and structure refinement parameters for HIAM-3016-op.

|                                   |                                                                  |                  |
|-----------------------------------|------------------------------------------------------------------|------------------|
| CCDC No.                          | 2354184                                                          |                  |
| Empirical formula                 | C <sub>26</sub> H <sub>15</sub> N <sub>3</sub> O <sub>4</sub> Zn |                  |
| Formula weight                    | 498.78                                                           |                  |
| Temperature                       | 193 K                                                            |                  |
| Wavelength                        | 1.34139 Å                                                        |                  |
| Crystal system                    | monoclinic                                                       |                  |
| Space group                       | C2/c                                                             |                  |
| Unit cell dimensions              | a = 28.486(6) Å                                                  | α = 90°          |
|                                   | b = 26.892(6) Å                                                  | β = 110.239(12)° |
|                                   | c = 20.509(5) Å                                                  | γ = 90°          |
| Volume                            | 14741 (6) Å <sup>3</sup>                                         |                  |
| Z                                 | 8                                                                |                  |
| Density (calculated)              | 0.449 g/cm <sup>3</sup>                                          |                  |
| Absorption coefficient            | 0.368 mm <sup>-1</sup>                                           |                  |
| F(000)                            | 2031                                                             |                  |
| Crystal size                      | 0.2 x 0.1 x 0.1 mm <sup>3</sup>                                  |                  |
| Theta range for data collection   | 4.06 to 105.91°                                                  |                  |
| Index ranges                      | -33 ≤ h ≤ 31, -31 ≤ k ≤ 31, 0 ≤ l ≤ 24                           |                  |
| Reflections collected             | 24396                                                            |                  |
| Independent reflections           | 24396 [R(int) = 0.1055, R(sigma) = 0.0966]                       |                  |
| Data / restraints / parameters    | 24396/3/311                                                      |                  |
| Goodness-of-fit on F <sup>2</sup> | 1.035                                                            |                  |
| Final R indices [I > 2σ(I)]       | R1 = 0.1010, wR2 = 0.2403                                        |                  |
| R indices (all data)              | R1 = 0.1699, wR2 = 0.2871                                        |                  |
| Largest diff. peak and hole       | 0.44 and -0.90 e.Å <sup>-3</sup>                                 |                  |



Table S2. Crystal data and structure refinement parameters for HIAM-3016.

|                                   |                                                                  |                 |
|-----------------------------------|------------------------------------------------------------------|-----------------|
| CCDC No.                          | 2368472                                                          |                 |
| Empirical formula                 | C <sub>32</sub> H <sub>29</sub> N <sub>5</sub> O <sub>6</sub> Zn |                 |
| Formula weight                    | 644.97                                                           |                 |
| Temperature                       | 193 K                                                            |                 |
| Wavelength                        | 0.71073 Å                                                        |                 |
| Crystal system                    | monoclinic                                                       |                 |
| Space group                       | C2/c                                                             |                 |
| Unit cell dimensions              | a = 28.630(2) Å                                                  | α = 90°         |
|                                   | b = 26.8008(19) Å                                                | β = 109.961(2)° |
|                                   | c = 20.3644(16) Å                                                | γ = 90°         |
| Volume                            | 14686.9(19) Å <sup>3</sup>                                       |                 |
| Z                                 | 8                                                                |                 |
| Density (calculated)              | 0.583 g/m <sup>3</sup>                                           |                 |
| Absorption coefficient            | 0.356 mm <sup>-1</sup>                                           |                 |
| F(000)                            | 2672.0                                                           |                 |
| Crystal size                      | 0.13 x 0.12 x 0.1 mm <sup>3</sup>                                |                 |
| Theta range for data collection   | 3.71 to 54.988°                                                  |                 |
| Index ranges                      | -37 ≤ h ≤ 37, -30 ≤ k ≤ 34, -26 ≤ l ≤ 23                         |                 |
| Reflections collected             | 67204                                                            |                 |
| Independent reflections           | 16814 [R(int) = 0.0835, R(sigma) = 0.0850]                       |                 |
| Data / restraints / parameters    | 16814/48/449                                                     |                 |
| Goodness-of-fit on F <sup>2</sup> | 0.961                                                            |                 |
| Final R indices [I > 2σ(I)]       | R1 = 0.0557, wR2 = 0.1498                                        |                 |
| R indices (all data)              | R1 = 0.0869, wR2 = 0.1642                                        |                 |
| Largest diff. peak and hole       | 0.50 and -0.46 e.Å <sup>-3</sup>                                 |                 |

Table S3. Crystal data and structure refinement parameters for HIAM-3017-op.

|                                   |                                                                               |                  |
|-----------------------------------|-------------------------------------------------------------------------------|------------------|
| CCDC No.                          | 2354185                                                                       |                  |
| Empirical formula                 | C <sub>67</sub> H <sub>45</sub> N <sub>7</sub> O <sub>9</sub> Zn <sub>2</sub> |                  |
| Formula weight                    | 1222.84                                                                       |                  |
| Temperature                       | 193 K                                                                         |                  |
| Wavelength                        | 1.34139 Å                                                                     |                  |
| Crystal system                    | monoclinic                                                                    |                  |
| Space group                       | C2/c                                                                          |                  |
| Unit cell dimensions              | a = 27.145(7) Å                                                               | α = 90°          |
|                                   | b = 28.184(7) Å                                                               | β = 108.221(12)° |
|                                   | c = 31.874(8) Å                                                               | γ = 90°          |
| Volume                            | 23162(10) Å <sup>3</sup>                                                      |                  |
| Z                                 | 8                                                                             |                  |
| Density (calculated)              | 0.701 g/cm <sup>3</sup>                                                       |                  |
| Absorption coefficient            | 0.509 mm <sup>-1</sup>                                                        |                  |
| F(000)                            | 5024                                                                          |                  |
| Crystal size                      | 0.15 x 0.1 x 0.1 mm <sup>3</sup>                                              |                  |
| Theta range for data collection   | 4.04 to 106.98°                                                               |                  |
| Index ranges                      | -28 ≤ h ≤ 32, -33 ≤ k ≤ 33, -37 ≤ l ≤ 37                                      |                  |
| Reflections collected             | 119774                                                                        |                  |
| Independent reflections           | 20547 [R(int) = 0.0675, R(sigma) = 0.0476]                                    |                  |
| Data / restraints / parameters    | 20547/687/793                                                                 |                  |
| Goodness-of-fit on F <sup>2</sup> | 1.021                                                                         |                  |
| Final R indices [I > 2σ(I)]       | R1 = 0.1406, wR2 = 0.3180                                                     |                  |
| R indices (all data)              | R1 = 0.1549, wR2 = 0.3252                                                     |                  |
| Largest diff. peak and hole       | 1.74 and -1.60 e.Å <sup>-3</sup>                                              |                  |

## References

1. Han, C.-Q.; Wang, L.; Si, J.; Zhou, K.; Liu, X.-Y., Reticular Chemistry Directed “One-Pot” Strategy to in situ Construct Organic Linkers and Zirconium-Organic Frameworks. *Small* 2024, 20, 2402263.
